# Supplementary material for: Comprehensive Analysis of the Soybean (Glycine max) GmLAX Auxin Transporter Gene Family
Source: PubMed Central journal article supplement (PMC4783406; doi:10.3389/fpls.2016.00282), 2016-03-09
Supplement: Table1.pdf [file Table1.pdf]

**Supplementary Table S1. Protein sequences used in the phylogenetic relationship analysis.**

| <b>Species</b>              | <b>Gene name</b> | <b>Locus ID<sup>a</sup></b> | <b>Transcript name<sup>a</sup></b> |
|-----------------------------|------------------|-----------------------------|------------------------------------|
| <i>Arabidopsis thaliana</i> | <i>AtLAX3</i>    | AT1G77690                   | AT1G77690.1                        |
|                             | <i>AtLAX2</i>    | AT2G21050                   | AT2G21050.1                        |
|                             | <i>AtAUX1</i>    | AT2G38120                   | AT2G38120.1                        |
|                             | <i>AtLAX1</i>    | AT5G01240                   | AT5G01240.1                        |
| <i>Glycine max</i>          | <i>GmLAX1</i>    | Glyma.01G114000             | Glyma.01G114000.1                  |
|                             | <i>GmLAX2</i>    | Glyma.02G255800             | Glyma.02G255800.1                  |
|                             | <i>GmLAX3</i>    | Glyma.03G063600             | Glyma.03G063600.1                  |
|                             | <i>GmLAX4</i>    | Glyma.03G063900             | Glyma.03G063900.1                  |
|                             | <i>GmLAX5</i>    | Glyma.04G004800             | Glyma.04G004800.1                  |
|                             | <i>GmLAX6</i>    | Glyma.04G252300             | Glyma.04G252300.1                  |
|                             | <i>GmLAX7</i>    | Glyma.06G004500             | Glyma.06G004500.1                  |
|                             | <i>GmLAX8</i>    | Glyma.06G110200             | Glyma.06G110200.1                  |
|                             | <i>GmLAX9</i>    | Glyma.07G147000             | Glyma.07G147000.1                  |
|                             | <i>GmLAX10</i>   | Glyma.11G106000             | Glyma.11G106000.1                  |
|                             | <i>GmLAX11</i>   | Glyma.11G228300             | Glyma.11G228300.1                  |
|                             | <i>GmLAX12</i>   | Glyma.12G030900             | Glyma.12G030900.1                  |
|                             | <i>GmLAX13</i>   | Glyma.14G060700             | Glyma.14G060700.1                  |
|                             | <i>GmLAX14</i>   | Glyma.18G029000             | Glyma.18G029000.1                  |
|                             | <i>GmLAX15</i>   | Glyma.18G198400             | Glyma.18G198400.1                  |
| <i>Medicago truncatula</i>  | <i>MtLAX1</i>    | Medtr5g082220               | Medtr5g082220.1                    |
|                             | <i>MtLAX2</i>    | Medtr7g067450               | Medtr7g067450.1                    |
|                             | <i>MtLAX3</i>    | Medtr3g072870               | Medtr3g072870.1                    |
|                             | <i>MtLAX4</i>    | Medtr4g415390               | Medtr4g415390.1                    |
|                             | <i>MtLAX5</i>    | Medtr4g073770               | Medtr4g073770.1                    |
| <i>Phaseolus vulgaris</i>   | <i>PvLAX1</i>    | Phvul.001G241500            | Phvul.001G241500.1                 |
|                             | <i>PvLAX2</i>    | Phvul.008G106300            | Phvul.008G106300.1                 |
|                             | <i>PvLAX3</i>    | Phvul.008G225300            | Phvul.008G225300.1                 |
|                             | <i>PvLAX4</i>    | Phvul.009G120700            | Phvul.009G120700.1                 |
|                             | <i>PvLAX5</i>    | Phvul.009G122200            | Phvul.009G122200.1                 |
|                             | <i>PvLAX6</i>    | Phvul.010G003600            | Phvul.010G003600.1                 |
|                             | <i>PvLAX7</i>    | Phvul.011G034000            | Phvul.011G034000.1                 |

|                        |               |                    |                      |
|------------------------|---------------|--------------------|----------------------|
| <i>Lotus japonicus</i> | <i>LjLAX1</i> | chr3.CM011260.r2.m | chr3.CM0112.160.r2.m |
|                        | <i>LjLAX2</i> | LjSGA_009163       | LjSGA_009163.1       |
| <i>Oryza sativa</i>    | <i>OsLAX1</i> | LOC_Os01g63770     | LOC_Os01g63770.1     |
|                        | <i>OsLAX2</i> | LOC_Os03g14080     | LOC_Os03g14080.1     |
|                        | <i>OsLAX3</i> | LOC_Os05g37470     | LOC_Os05g37470.1     |
|                        | <i>OsLAX4</i> | LOC_Os10g05690     | LOC_Os10g05690.1     |
|                        | <i>OsLAX5</i> | LOC_Os11g06820     | LOC_Os11g06820.1     |
| <i>Sorghum bicolor</i> | <i>SbLAX1</i> | Sb01g026240        | Sb01g026240.1        |
|                        | <i>SbLAX2</i> | Sb01g041270        | Sb01g041270.1        |
|                        | <i>SbLAX3</i> | Sb03g040320        | Sb03g040320.1        |
|                        | <i>SbLAX4</i> | Sb05g004250        | Sb05g004250.1        |
|                        | <i>SbLAX5</i> | Sb09g021990        | Sb09g021990.1        |
| <i>Zea mays</i>        | <i>ZmLAX1</i> | GRMZM2G149481      | GRMZM2G149481_T01    |
|                        | <i>ZmLAX2</i> | GRMZM2G129413      | GRMZM2G129413_T01    |
|                        | <i>ZmLAX3</i> | GRMZM2G127949      | GRMZM2G127949_T01    |
|                        | <i>ZmLAX4</i> | GRMZM2G045057      | GRMZM2G045057_T01    |
|                        | <i>ZmLAX5</i> | GRMZM2G067022      | GRMZM2G067022_T02    |

---

<sup>a</sup>, protein sequences from *Lotus japonicus* were retrieved from <http://www.kazusa.or.jp/lotus/>, and all others were from phytozome 10.3 (<http://phytozome.jgi.doe.gov/pz/portal.html>).

**Supplementary Table S2. Primers used in qPCR analyses.**

| <b>Gene name</b> | <b>Locus ID</b> | <b>Forward primer (5'-3')</b> | <b>Reverse primer (5'-3')</b> |
|------------------|-----------------|-------------------------------|-------------------------------|
| <i>GmLAX1</i>    | Glyma.01G114000 | TGTGCCACCACTGTTTTTCAT         | GTGTGCGTGACATTTTCCAC          |
| <i>GmLAX2</i>    | Glyma.02G255800 | CCGACAGAATGCTGTTGAGA          | CCAAATCCAAATCCAACCAC          |
| <i>GmLAX3</i>    | Glyma.03G063600 | CTGGCAGGGTTTTGCATTAT          | GCCTGTGCATTTTCATAGCAA         |
| <i>GmLAX4</i>    | Glyma.03G063900 | CTCCTTTCTTCATGCCAAGC          | G TTCAGGGCATTGGTAGCAT         |
| <i>GmLAX5</i>    | Glyma.04G004800 | TTGTGGTGGTGTGGGTTCTA          | GCGGTTGAGTTGATGGAAGT          |
| <i>GmLAX6</i>    | Glyma.04G252300 | GCCAGCCCCTATACGA ACTT         | GCTACGTAGGGGGAGGAAAG          |
| <i>GmLAX7</i>    | Glyma.06G004500 | AAAATGTTACCAGTGCCCCA          | CTAGCTAGCGATGAATGGGC          |
| <i>GmLAX8</i>    | Glyma.06G110200 | TGTCAGCTAAAGGTGCGATG          | AGAGGGAGAACGCAAATCAA          |
| <i>GmLAX9</i>    | Glyma.07G147000 | GCCACAGCTCATATGCTCAC          | ACCAAACCCACACCACAAT           |
| <i>GmLAX10</i>   | Glyma.11G106000 | GTGTTACCAATGCCCTCCAC          | TAGGGTGCGGCTTCATAGAT          |
| <i>GmLAX11</i>   | Glyma.11G228300 | GCGAGGTTACCTGTGGTGAT          | AGCAGGGATGATGTAAACGG          |
| <i>GmLAX12</i>   | Glyma.12G030900 | GTGTTACCAATGCCCTCCAC          | CCTAGGGTGTGGCTTCATATA         |
| <i>GmLAX13</i>   | Glyma.14G060700 | AGGGACACATCAGCATCTCC          | ACCAAATGATTCGAAAGCG           |
| <i>GmLAX14</i>   | Glyma.18G029000 | ATTTGGGTTTGCTTGTACGC          | ATCACCACAGGTAACCTCGC          |
| <i>GmLAX15</i>   | Glyma.18G198400 | ATTGTGGTGTGGGTTTTGGT          | GGCTTGCATTGGTAGCATT           |
| <i>GmUBI3</i>    | Glyma.20g141600 | GTGTAATGTTGGATGTGTTCCC        | ACACAATTGAGTTCAACACAAACCG     |

**Supplementary Table S3. *GmLAXs* gene information.**

| Gene Name      | Locus ID <sup>a</sup> | Protein <sup>b</sup> |          |      | Chromosome <sup>a</sup> | Location (Mb) <sup>a</sup> | Strand direction <sup>a</sup> | Transmembrane helices <sup>c</sup> | Subcelluar localization <sup>d</sup> |
|----------------|-----------------------|----------------------|----------|------|-------------------------|----------------------------|-------------------------------|------------------------------------|--------------------------------------|
|                |                       | length               | MW (kDa) | PI   |                         |                            |                               |                                    |                                      |
| <i>GmLAX1</i>  | Glyma.01G114000       | 483                  | 54.5     | 8.63 | Chr01                   | 39.29                      | -                             | 10                                 | plas                                 |
| <i>GmLAX2</i>  | Glyma.02G255800       | 485                  | 54.7     | 8.33 | Chr02                   | 44.27                      | +                             | 10                                 | cyto                                 |
| <i>GmLAX3</i>  | Glyma.03G063600       | 483                  | 54.6     | 8.33 | Chr03                   | 10.13                      | +                             | 10                                 | plas                                 |
| <i>GmLAX4</i>  | Glyma.03G063900       | 506                  | 57.1     | 7.46 | Chr03                   | 10.26                      | -                             | 10                                 | plas                                 |
| <i>GmLAX5</i>  | Glyma.04G004800       | 476                  | 53.8     | 9.02 | Chr04                   | 0.41                       | +                             | 10                                 | plas                                 |
| <i>GmLAX6</i>  | Glyma.04G252300       | 465                  | 52.5     | 8.66 | Chr04                   | 51.91                      | -                             | 10                                 | cyto                                 |
| <i>GmLAX7</i>  | Glyma.06G004500       | 481                  | 54.3     | 8.75 | Chr06                   | 0.40                       | +                             | 10                                 | plas                                 |
| <i>GmLAX8</i>  | Glyma.06G110200       | 465                  | 52.6     | 8.65 | Chr06                   | 8.91                       | +                             | 10                                 | cyto                                 |
| <i>GmLAX9</i>  | Glyma.07G147000       | 494                  | 55.9     | 7.92 | Chr07                   | 17.71                      | +                             | 10                                 | plas                                 |
| <i>GmLAX10</i> | Glyma.11G106000       | 488                  | 55.1     | 9.01 | Chr11                   | 8.06                       | -                             | 10                                 | plas                                 |
| <i>GmLAX11</i> | Glyma.11G228300       | 479                  | 54.2     | 8.24 | Chr11                   | 32.37                      | +                             | 10                                 | plas                                 |
| <i>GmLAX12</i> | Glyma.12G030900       | 488                  | 55.1     | 9.01 | Chr12                   | 2.31                       | -                             | 10                                 | plas                                 |
| <i>GmLAX13</i> | Glyma.14G060700       | 482                  | 54.3     | 8.28 | Chr14                   | 4.92                       | -                             | 10                                 | plas/cyto                            |
| <i>GmLAX14</i> | Glyma.18G029000       | 479                  | 54.3     | 8.38 | Chr18                   | 2.19                       | -                             | 10                                 | plas                                 |
| <i>GmLAX15</i> | Glyma.18G198400       | 494                  | 55.9     | 7.92 | Chr18                   | 47.66                      | +                             | 10                                 | plas                                 |

<sup>a</sup>, the *GmLAXs* gene information was retrieved from the *Glycine max Wm82.a2.v1* genome annotation (phytozome 10.3: <http://phytozome.jgi.doe.gov/pz/portal.html>)

<sup>b</sup>, protein profiles are calculated using the Lasergene (v7.1) software.

<sup>c</sup>, transmembrane helices were predicted using the TMHMM Server v2.0 (<http://www.cbs.dtu.dk/services/TMHMM/>).

<sup>d</sup>, subcellular localization was predicted by WoLF PSORT ([http://www.genscript.com/psort/wolf\\_psort.html](http://www.genscript.com/psort/wolf_psort.html)).

**Supplementary Table S4. Percent ORF nucleotide (bottom-left) and amino acid (up-right, bold) identities of *GmLAX*s. Colored cells highlight data of duplicated gene pairs.**

|                | <i>GmLAX1</i> | <i>GmLAX2</i> | <i>GmLAX3</i> | <i>GmLAX4</i> | <i>GmLAX5</i> | <i>GmLAX6</i> | <i>GmLAX7</i> | <i>GmLAX8</i> | <i>GmLAX9</i> | <i>GmLAX10</i> | <i>GmLAX11</i> | <i>GmLAX12</i> | <i>GmLAX13</i> | <i>GmLAX14</i> | <i>GmLAX15</i> |
|----------------|---------------|---------------|---------------|---------------|---------------|---------------|---------------|---------------|---------------|----------------|----------------|----------------|----------------|----------------|----------------|
| <i>GmLAX1</i>  | ***           | 83.5          | <b>97.1</b>   | 87.6          | 78.3          | 79.3          | 77.9          | 79.5          | 90.9          | 79.2           | 84             | 79.2           | 85.7           | 83.8           | 91.1           |
| <i>GmLAX2</i>  | 75.4          | ***           | <b>84.2</b>   | <b>78.3</b>   | <b>74.6</b>   | <b>77.8</b>   | <b>74.5</b>   | <b>77.6</b>   | <b>82</b>     | <b>75.7</b>    | <b>87.7</b>    | <b>75.7</b>    | <b>95.9</b>    | <b>87.5</b>    | <b>82.9</b>    |
| <i>GmLAX3</i>  | <b>96.6</b>   | 75.7          | ***           | <b>88.4</b>   | <b>78.1</b>   | <b>79.7</b>   | <b>77.7</b>   | <b>80</b>     | <b>91.7</b>   | <b>79</b>      | <b>84.8</b>    | <b>79</b>      | <b>86.8</b>    | <b>84.6</b>    | <b>91.9</b>    |
| <i>GmLAX4</i>  | 90.5          | 74.7          | 90.8          | ***           | <b>74.5</b>   | <b>76.1</b>   | <b>74.7</b>   | <b>76.3</b>   | <b>86</b>     | <b>76</b>      | <b>80.7</b>    | <b>75.8</b>    | <b>80.4</b>    | <b>80.1</b>    | <b>86.2</b>    |
| <i>GmLAX5</i>  | 71            | 72.6          | 71.3          | 70.1          | ***           | <b>84.5</b>   | <b>97.1</b>   | <b>84.5</b>   | <b>78.1</b>   | <b>89.7</b>    | <b>75.3</b>    | <b>90.5</b>    | <b>75.7</b>    | <b>75.3</b>    | <b>78.1</b>    |
| <i>GmLAX6</i>  | 72.1          | 71.6          | 72            | 71.6          | 75.2          | ***           | <b>84.1</b>   | <b>98.3</b>   | <b>77.4</b>   | <b>85.1</b>    | <b>78.3</b>    | <b>85.3</b>    | <b>79.2</b>    | <b>79</b>      | <b>77.4</b>    |
| <i>GmLAX7</i>  | 70.8          | 71.9          | 71.1          | 69.6          | <b>96.6</b>   | 75.1          | ***           | <b>84.1</b>   | <b>77.3</b>   | <b>90</b>      | <b>75.1</b>    | <b>91.1</b>    | <b>75.6</b>    | <b>74.9</b>    | <b>77.3</b>    |
| <i>GmLAX8</i>  | 71.9          | 71.7          | 72.1          | 71.4          | 74.5          | <b>97.6</b>   | 74.5          | ***           | <b>77.2</b>   | <b>85.1</b>    | <b>77.9</b>    | <b>85.3</b>    | <b>79</b>      | <b>78.5</b>    | <b>77.2</b>    |
| <i>GmLAX9</i>  | 86.6          | 76.1          | 87.3          | 84.3          | 70.8          | 71.6          | 70            | 71.1          | ***           | <b>78.8</b>    | <b>82.7</b>    | <b>78.5</b>    | <b>84</b>      | <b>82.7</b>    | <b>99</b>      |
| <i>GmLAX10</i> | 71.6          | 71.4          | 71.9          | 69.5          | 87.8          | 75.2          | 87.8          | 75            | 70.8          | ***            | <b>76.4</b>    | <b>98.6</b>    | <b>76.4</b>    | <b>76.6</b>    | <b>78.8</b>    |
| <i>GmLAX11</i> | 76            | 85.1          | 76.6          | 74.8          | 72.2          | 71.4          | 71.6          | 71.1          | 76.7          | 71.1           | ***            | <b>76.4</b>    | <b>90.2</b>    | <b>97.3</b>    | <b>83.1</b>    |
| <i>GmLAX12</i> | 71.3          | 71.9          | 71.4          | 69.1          | 88.5          | 74.8          | 88.7          | 74.8          | 70.3          | <b>97.5</b>    | 71.4           | ***            | <b>76.9</b>    | <b>76.6</b>    | <b>78.5</b>    |
| <i>GmLAX13</i> | 76.5          | <b>96.4</b>   | 76.7          | 75.4          | 72.3          | 71.4          | 71.5          | 71.4          | 76.8          | 71.4           | 86.1           | 71.9           | ***            | <b>90.2</b>    | <b>84.4</b>    |
| <i>GmLAX14</i> | 75.4          | 85.1          | 76            | 74.4          | 72.1          | 71.4          | 71.6          | 71.2          | 76.5          | 70.9           | <b>97.6</b>    | 71.4           | 86.2           | ***            | <b>83.1</b>    |
| <i>GmLAX15</i> | 86.6          | 75.9          | 87.1          | 84.6          | 70.9          | 71.7          | 70.3          | 71.2          | <b>98</b>     | 70.8           | 76.5           | 70.3           | 76.3           | 76.5           | ***            |
